# Supplementary material
Source: PubMed Central journal article supplement (PMC4946867)
Supplement: NIHMS702844-supplement-supplement_1.pdf [file NIHMS702844-supplement-supplement_1.pdf]

- 1  
2  
3 727 Seeber, M., Scherer, R., Wagner, J., Solis-Escalante, T., and Müller-Putz, G.R. (2014). EEG beta  
4 728 suppression and low gamma modulation are different elements of human upright walking. *Front*  
5 729 *Hum Neurosci* 8: 485. doi: 10.3389/fnhum.2014.00485.
- 6  
7  
8 730 Seeber, M., Scherer, R., Wagner, J., Solis-Escalante, T., and Müller-Putz, G.R. (2015). High and  
9 731 low gamma EEG oscillations in central sensorimotor areas are conversely modulated during the  
10 732 human gait cycle. *Neuroimage* 112:318-26. doi: 10.1016/j.neuroimage.2015.03.045.
- 11  
12  
13 733 Severens, M., Nienhuis, B., Desain, P., and Duysens, J. (2012). Feasibility of measuring event  
14 734 related desynchronization with electroencephalography during walking. *Conf Proc IEEE Eng*  
15 735 *Med Biol Soc*, 2764-2767. doi: 10.1109/EMBC.2012.6346537.
- 16  
17  
18 736 Sipp, A.R., Gwin, J.T., Makeig, S., and Ferris, D.P. (2013). Loss of balance during balance beam  
19 737 walking elicits a multifocal theta band electrocortical response. *J Neurophysiol* 110, 2050-2060.  
20 738 doi: 10.1152/jn.00744.2012.
- 21  
22  
23 739 Sweeney, K.T., McLoone, S.F., and Ward, T.E. (2013). The use of ensemble empirical mode  
24 740 decomposition with canonical correlation analysis as a novel artifact removal technique. *IEEE*  
25 741 *Trans Biomed Eng* 60(1), 97-105. doi: 10.1109/TBME.2012.2225427
- 26  
27  
28 742 Sweeney, K.T., Leamy, D.J., Ward, T.E., and Mcloone, S. (2010). Intelligent artifact  
29 743 classification for ambulatory physiological signals. *Conf Proc IEEE Eng Med Biol Soc* 6349-  
30 744 6352. doi: 10.1109/IEMBS.2010.5627285.
- 31  
32  
33 745 Suzuki, M., Miyai, I., Ono, T., Oda, I., Konishi, I., Kochiyama, T., and Kubota, K. (2004).  
34 746 Prefrontal and premotor cortices are involved in adapting walking and running speed on the  
35 747 treadmill: an optical imaging study. *Neuroimage* 23, 1020-1026. doi:  
36 748 10.1016/j.neuroimage.2004.07.002.
- 37  
38  
39 749 Villringer, A., and Chance, B. (1997). Non-invasive optical spectroscopy and imaging of human  
40 750 brain function. *Trends Neurosci* 20, 435-442.
- 41  
42  
43 751 Wagner, J., Solis-Escalante, T., Grieshofer, P., Neuper, C., Muller-Putz, G., and Scherer, R.  
44 752 (2012). Level of participation in robotic-assisted treadmill walking modulates midline  
45 753 sensorimotor EEG rhythms in able-bodied subjects. *Neuroimage* 63, 1203-1211. doi:  
46 754 10.1016/j.neuroimage.2012.08.019.
- 47  
48  
49  
50  
51  
52  
53 755  
54  
55 756 Supplementary Table 1. ERSP correlations across subjects for channel A1 at 1.2 m/s.  
56  
57  
58  
59  
60

757

|   | 1 | 2    | 3    | 4    | 5     | 6     | 7     | 8     | 9    |
|---|---|------|------|------|-------|-------|-------|-------|------|
| 1 | 1 | 0.59 | 0.12 | 0.28 | -0.03 | -0.06 | 0.07  | 0.02  | 0.23 |
| 2 |   | 1    | 0.27 | 0.39 | -0.10 | -0.03 | 0.10  | 0.27  | 0.47 |
| 3 |   |      | 1    | 0.33 | -0.09 | -0.07 | -0.30 | 0.30  | 0.24 |
| 4 |   |      |      | 1    | 0.19  | 0.10  | 0.36  | 0.48  | 0.16 |
| 5 |   |      |      |      | 1     | -0.15 | 0.39  | 0.04  | 0.04 |
| 6 |   |      |      |      |       | 1     | 0.21  | -0.19 | 0.01 |
| 7 |   |      |      |      |       |       | 1     | 0.07  | 0.21 |
| 8 |   |      |      |      |       |       |       | 1     | 0.06 |
| 9 |   |      |      |      |       |       |       |       | 1    |

758
